1 Demographic causes of adult sex ratio variation and their consequences for  
2 parental cooperation

3 **Authors:**

4 Luke J. Eberhart-Phillips<sup>1,2\*</sup>, Clemens Küpper<sup>2</sup>, María Cristina Carmona-Isunza<sup>3</sup>,  
5 Orsolya Vincze<sup>4,5</sup>, Sama Zefania<sup>6</sup>, Medardo Cruz-López<sup>7</sup>, András Kosztolányi<sup>8</sup>, Tom E.  
6 X. Miller<sup>9</sup>, Zoltán Barta<sup>4</sup>, Innes C. Cuthill<sup>10</sup>, Terry Burke<sup>11</sup>, Tamás Székely<sup>3,4§</sup>, Joseph I.  
7 Hoffman<sup>1§</sup>, and Oliver Krüger<sup>1§</sup>

8 **Affiliations:**

9 <sup>1</sup>Department of Animal Behaviour, Bielefeld University, Morgenbreede 45, 33615  
10 Bielefeld, Germany

11 <sup>2</sup>Research Group Behavioural Genetics and Evolutionary Ecology, Max Planck Institute  
12 for Ornithology, Eberhard-Gwinner-Str. 5, 82319 Seewiesen, Germany

13 <sup>3</sup>Milner Centre for Evolution, Department of Biology and Biochemistry, University of  
14 Bath, Claverton Down, Bath BA2 7AY, UK

15 <sup>4</sup>MTA-DE Behavioural Ecology Research Group, Department of Evolutionary Zoology,  
16 University of Debrecen, 4032 Debrecen, Hungary

17 <sup>5</sup>Hungarian Department of Biology and Ecology, Babeş-Bolyai University, Cluj Napoca,  
18 RO-400006, Romania

19 <sup>6</sup>Department of Animal Biology, University of Toliara, PO Box 185, Toliara, Madagascar

20 <sup>7</sup>Posgrado de Ciencias del Mar y Limnología, Unidad Académica Mazatlán, Universidad  
21 Nacional Autónoma de México, Ciudad Universitaria, 04510 México D.F., Mexico

22 <sup>8</sup>Department of Ecology, University of Veterinary Medicine Budapest, 1078 Budapest,  
23 Hungary

24 <sup>9</sup>Department of BioSciences, Program in Ecology and Evolutionary Biology, Rice  
25 University, MS-170, Houston, TX 77005, USA

26 <sup>10</sup>School of Biological Sciences, University of Bristol, Bristol, BS8 1TQ, UK

27 <sup>11</sup>Department of Animal and Plant Sciences, University of Sheffield, Sheffield S10 2TN,  
28 UK

29 <sup>§</sup>Joint senior authors

30 **\*Correspondence to:**

31 Luke J. Eberhart-Phillips,  
32 Research Group Behavioural Genetics and Evolutionary Ecology  
33 Max Planck Institute for Ornithology  
34 Eberhard-Gwinner-Str. 5, 82319 Seewiesen, Germany  
35 Email: [luke.eberhart@orn.mpg.de](mailto:luke.eberhart@orn.mpg.de)  
36 Phone: +49 8157 932-424  
37 Fax: +49 8157 932-214

38 **Manuscript category:**

39 Article

40 **Abstract:**

41 The adult sex ratio (ASR) is a fundamental concept in population biology, sexual selection,  
42 and social evolution. However, it remains unclear which demographic processes generate  
43 ASR variation and how biases in ASR in turn affect social behaviour. Here, we evaluate the  
44 demographic mechanisms shaping ASR and their consequences for parental cooperation  
45 using detailed survival, fecundity, and behavioural data on 6,119 individuals from six wild  
46 shorebird populations exhibiting flexible parental strategies. We show that these closely  
47 related populations express strikingly different ASRs, despite having similar ecologies and  
48 life histories, and that ASR variation is largely driven by sex differences in the apparent  
49 survival of juveniles. Furthermore, families in populations with biased ASRs were  
50 predominantly tended by a single parent, suggesting that parental cooperation breaks down  
51 with unbalanced sex ratios. Taken together, our results indicate that sex biases emerging  
52 during early life have profound consequences for social behaviour.

53 **Main text:**

54 Sex ratio variation is a fundamental component of life-history evolution. At conception, birth,  
55 and adulthood, the ratios of males to females have long been hypothesized by evolutionary  
56 biologists and human demographers as catalysts for social behaviour and population  
57 dynamics<sup>1,2</sup>. In particular, the adult sex ratio (ASR) exhibits remarkable variation throughout  
58 nature, with birds and mammals tending to have male-biased and female-biased ASRs,  
59 respectively<sup>3</sup>. Recent studies also show extreme shifts in ASR due to climate change in fish<sup>4</sup>,  
60 amphibians<sup>5</sup>, and dioecious plants<sup>6</sup>. By influencing mate availability, ASR bias can alter  
61 social behaviour with divorce, infidelity, and parental antagonism being more frequent in  
62 sex-biased populations<sup>7,8</sup>. Moreover, in human societies, ASR variation is linked to economic  
63 decisions, community violence, and disease prevalence<sup>9-11</sup>. Yet despite the widespread  
64 occurrence of ASR bias and its significance in evolutionary ecology and social science, the  
65 demographic source(s) of ASR variation and their ramifications for social behaviour remain  
66 unclear<sup>12</sup>.

67 Sex ratio theory is concerned with the adaptive consequences of sex-biased parental  
68 allocation to offspring<sup>13,14</sup>, with the processes generating sex ratio bias after birth receiving  
69 less theoretical and empirical attention<sup>15</sup>. Here, we use a demographic pathway model to  
70 quantify ASR variation among avian populations and to determine whether this variation is  
71 predominantly caused by sex biases at birth, during juvenile development, or in adulthood.  
72 We parameterized our model with detailed individual-based life history data from *Charadrius*  
73 plovers – small ground-nesting shorebirds that occur worldwide. Plovers exhibit remarkable  
74 diversity and plasticity in breeding behaviour with sex roles during courtship, mating, and  
75 parental care varying appreciably among populations both between and within species<sup>16,17</sup>.  
76 This behavioural variation, coupled with their tractability in the field (Supplementary Video

77 1), allowed us to explore the sources and significance of demographic sex biases among  
78 closely related wild populations in the light of social evolution.

## 79 **Results and Discussion**

80 Over a total of 43 observational years of fieldwork, we monitored the survival, fecundity, and  
81 breeding behaviour of 6,119 individually marked plovers from six populations of five closely  
82 related species worldwide (Fig. 1a). We then employed two-sex stage-structured population  
83 matrix models to derive estimates of ASR at equilibrium from stage- and sex-specific  
84 demographic rates of annual survival and reproduction (Fig. 1b)<sup>18</sup>. For each population, the  
85 numbers of male and female progeny in our model depended on modal clutch size and  
86 hatching sex ratio derived from our field data. Mark-recapture methods were used to estimate  
87 the apparent survival of juveniles and adults while accounting for sex differences in detection  
88 probability (the term “apparent survival” indicates that mortality cannot be disentangled from  
89 permanent emigration)<sup>19</sup>. Fecundity was derived from a mating function that depended on the  
90 extent of polygamy observed in each population and the frequency of available mates (see  
91 *Methods* for details).

92 The hatching sex ratio, based on 1,139 hatchlings from 503 families, did not deviate  
93 significantly from parity in any of the populations (Fig. 2a). Conversely, sex biases in  
94 apparent survival varied considerably within and among species and, in most populations,  
95 juvenile survival was more biased than adult survival – either towards males or females (Fig.  
96 2a). Taken together, these sources of demographic sex bias rendered significant deviations in  
97 ASR from parity for three populations (two male-biased and one female-biased; Fig. 2b).

98 Matrix models provide a flexible analytical environment to decompose the feedbacks  
99 between state-dependent vital rates and population response – an important method used in  
100 conservation biology for understanding life-history contributions to population growth and

101 viability<sup>20</sup>. In our case, we modified this approach to assess the relative contributions of sex  
102 allocation and sex-specific survival on ASR bias<sup>18</sup>. We found that sex biases in apparent  
103 survival during the juvenile stage contributed the most to sex ratio bias of the adult  
104 population: in populations with significantly skewed ASR, sex biases in juvenile survival  
105 contributed on average 7.2 times more than sex biases in adult apparent survival and 24.6  
106 times more than sex biases at hatching (Supplementary Fig. 1). Moreover, variation in  
107 hatching sex ratio had no effect on ASR – a result that provides empirical support for  
108 Fisher's<sup>13</sup> prediction of unbiased sex allocation regardless of sex-biased survival of  
109 independent young or adults.

110         In species where both parents have equal caring capabilities, the desertion of either  
111 parent is often influenced by the availability of potential mates<sup>21</sup> – parental care by the  
112 abundant sex is expected to be greater than that of the scarcer sex due to limited future  
113 reproductive potential<sup>22</sup>. Detailed behavioural observations of 471 plover families revealed  
114 high rates of parental desertion in populations with biased ASRs, whereas desertion was rare  
115 in unbiased populations (Fig. 3). We evaluated our *a priori* prediction of a quadratic  
116 relationship between parental cooperation and ASR variation using a regression analysis  
117 incorporating a bootstrap procedure that acknowledged uncertainty in our estimates of ASR  
118 and parental care (see *Methods* for details). We found that families in male- or female-biased  
119 populations tended to express higher rates of parental desertion, while unbiased populations  
120 were more likely to exhibit parental cooperation (Fig. 3a). This is supported by experimental  
121 evidence of sex-biased mating opportunities in three of the populations studied here  
122 (Supplementary Fig. 2; ref 23). Moreover, the relationship between parental cooperation and  
123 local ASR bias was apparent in our within-species contrast of *C. alexandrinus*: the unbiased  
124 Cape Verde population exhibited a higher rate of parental cooperation than the male-biased  
125 population in Turkey (Fig. 3a). Counterintuitively, we also found a high rate of male-only

126 care in *C. pecuarius* despite ASR being female-biased (Fig. 3b), although in line with  
127 expectations, *C. pecuarius* also showed the highest proportion of female-only care among our  
128 studied populations (Fig. 3b, Supplementary Fig. 3b). This provides partial support for the  
129 notion that breeding strategies may respond flexibly to local mating opportunities provided  
130 by ASR bias, while also suggesting that other factors may play a role, such as the energetic  
131 costs of egg production imposed on females or because of sex differences in parental  
132 quality<sup>24</sup> or the age at maturation<sup>25</sup>.

133         There are several ways in which sex-biased juvenile survival could potentially lead to  
134 a skewed ASR. Natal dispersal rates may differ between the sexes, as is typical of many  
135 birds<sup>26</sup>, which could contribute to our estimates of sex-biased apparent survival. Genetic  
136 studies of several of the populations presented here are partially consistent with this  
137 hypothesis, as island populations of *C. alexandrinus* and the endemic *C. thoracicus* have  
138 reduced gene flow relative to comparable mainland populations<sup>27,28</sup>. However, sex-biased  
139 juvenile survival in plovers has been reported elsewhere, even after accounting for  
140 dispersal<sup>29,30</sup>, implying that sex-differences in mortality are at least partly driven by intrinsic  
141 factors, conceivably for example via genotype-sex interactions<sup>31,32</sup>. An alternative but not  
142 necessarily mutually exclusive explanation is that males and females may differ in their  
143 premature investment into reproductive traits, which could inflict survival costs for the larger  
144 or more ornamented sex<sup>33</sup>. Although sexual dimorphism among adults is negligible in the  
145 species we studied<sup>34,35</sup>, sex-specific ontogeny does appear to vary in three of these  
146 populations. In male-biased populations of *C. nivosus* and *C. alexandrinus*, female hatchlings  
147 are smaller and grow more slowly than their brothers during the first weeks of life, whereas  
148 juveniles of the unbiased *C. alexandrinus* population exhibit no such sex-specific differences  
149 during early development<sup>34</sup>.

150           The association between sex-specific demography and breeding system evolution  
151 represents a causality dilemma because of the feedback that parental strategies impose on  
152 ASR bias and *vice versa*<sup>36</sup>. On the one hand, mating competition and parental care may entail  
153 costs via sexual selection that could drive differential survival of males over females and  
154 have knock-on effects on ASR<sup>37</sup>. On the other hand, sex-specific survival creates unequal  
155 mating opportunities via ASR that may influence mating patterns and parenting strategies<sup>37</sup>.  
156 Our study provides empirical support for the latter – sex biases emerge prior to sexual  
157 maturity, suggesting that this evolutionary feedback loop is catalysed by intrinsic early-life  
158 demographic variation. Moreover, our results add to the growing evidence of unbiased birth  
159 sex ratios in nature<sup>15</sup> and provide a comprehensive empirical test of Fisher’s<sup>13</sup> original  
160 prediction that influential sex biases arise in life-history stages beyond parental control. By  
161 unravelling the demographic foundations of adult sex ratio bias and their consequences for  
162 parental cooperation, we hope to stimulate future studies to understand the complex  
163 relationship between evolutionary demography and behavioural ecology.

## 164 **Methods**

### 165 *Field and laboratory methods*

166 We studied five *Charadrius* species comprising six populations from four sites worldwide  
167 (Fig. 1a, Supplementary Table 1). In Mexico, we monitored the snowy plover (*C. nivosus*) at  
168 Bahía de Ceuta, a subtropical lagoon on the Pacific coast. In Madagascar, we monitored the  
169 Kittlitz’s plover (*C. pecuarius*), white-fronted plover (*C. marginatus*), and the endemic  
170 Madagascar plover (*C. thoracicus*), all of which breed sympatrically at a saltwater marsh near  
171 the fishing village of Andavadoaka. Lastly, we monitored the Kentish plover (*C.*  
172 *alexandrinus*) at two independent populations located at Lake Tuzla in southern Turkey and  
173 at Maio in Cape Verde. The Mexico and Madagascar populations were monitored over a

174 seven-year period, whereas the Turkey and Cape Verde populations were monitored over six  
175 and nine years respectively, thus totalling 43 years of data collection (Supplementary Table  
176 1).

177 At each location, we collected mark-recapture and individual reproductive success  
178 data during daily surveys over the entire breeding season that typically spanned three to four  
179 months after a region's rainy season. Funnel traps were used to capture adults on broods or  
180 nests<sup>38</sup>. We assigned individuals to a unique colour combination of darvic rings and an  
181 alphanumeric metal ring, allowing the use of both captures and non-invasive resightings to  
182 estimate survival. Broods were monitored every five days on average to assess daily survival  
183 and identify tending parents. During captures, approximately 25–50  $\mu$ L of blood was sampled  
184 from the metatarsal vein of chicks and the brachial vein of adults for molecular sex typing  
185 with two independent markers Z-002B<sup>39</sup> and Calex-31, a microsatellite marker on the W  
186 chromosome<sup>40</sup>. Details of PCR conditions are given in ref. 34.

### 187 *Quantifying sex roles*

188 We evaluated sex role variation by summarizing for each population the proportion of all  
189 families that were attended bi-parentally or uni-parentally by a male or female. We restricted  
190 our field observations to include only broods that were at least 20 days old. Young chicks are  
191 attended by both parents in all populations although, as broods get older, male or female  
192 parents may desert the family<sup>41</sup>. As chicks typically fledge around 25 days of age, we  
193 therefore choose broods of between 20 and 25 days of age to quantify parental care given that  
194 at this age many parents already deserted the family but some still attend the young.  
195 Furthermore, we restricted these data to include only broods that had at least two sightings  
196 after 20 days. Given these criteria, our dataset consisted of 471 unique families distributed  
197 throughout the six populations and pooled across all years of study (Supplementary Table 2).



198 To account for surveyor oversight while recording tending parents (e.g., observing only one  
199 parent when two were present), we took a conservative approach by assigning a bi-parental  
200 status to families that had both uni-parental and bi-parental observations after the 20<sup>th</sup> day. In  
201 summary, desertion was most common in *C. nivosus* and *C. pecuarius*, whereas bi-parental  
202 care was most common in *C. alexandrinus* (Cape Verde), *C. thoracicus*, and *C. marginatus*  
203 (Fig. 3b, Supplementary Table 2). The *C. alexandrinus* population in Turkey had 50% bi-  
204 parental and 50% desertion (Fig. 3b, Supplementary Table 2). *C. pecuarius* had the highest  
205 incidence of male desertion (20%; Fig. 3b, Supplementary Table 2). To acknowledge  
206 uncertainty in these parental care proportions given variation in sample size, we used a  
207 method that estimated simultaneous 95% confidence intervals according to a multinomial  
208 distribution<sup>42</sup> (Supplementary Table 2).

#### 209 *Estimation of sex- and stage-specific survival*

210 Our structured population model considered sex-specific survival during two key stage  
211 classes in life history: juveniles and adults (Fig. 1b). The juvenile stage was defined as the  
212 one-year transition period between hatching and recruitment into the adult population. The  
213 adult stage represented a stasis stage in which individuals were annually retained in the  
214 population.

215 We used mark-recapture models to account for sex, stage, and temporal variation in  
216 encounter ( $p$ ) and apparent survival ( $\phi$ ) probabilities as they allow for imperfect detection of  
217 marked individuals during surveys and the inclusion of individuals with unknown fates<sup>40</sup>. We  
218 use the term “apparent survival” as true mortality cannot be disentangled from permanent  
219 emigration in this framework<sup>19</sup>. We used Cormack-Jolly-Seber models to estimate juvenile  
220 and adult survival, with one-year encounter intervals. Juvenile and adult survival models  
221 were constructed from design matrices that included sex, year, and stage as factors.

222           Since we were primarily interested in stage- and sex-specific variation in survival, all  
223 models included a  $\phi \sim \text{sex} * \text{stage}$  component. Our model selection thus evaluated the best  
224 structure explaining variation in detection probability by comparing all interactions between  
225 sex, year, and stage (e.g.,  $p \sim \text{sex} * \text{year} * \text{stage}$ ). We constructed survival models with the R  
226 package “RMark”<sup>43</sup> and estimated demographic parameters via maximum likelihood  
227 implemented in program MARK<sup>44</sup>. We evaluated whether our data were appropriately  
228 dispersed (i.e.  $c\text{-hat} \leq 3$ ; ref. 19) by employing the “median c-hat” goodness-of-fit bootstrap  
229 simulation in program MARK<sup>44</sup>.

### 230 *Estimating hatching sex ratios*

231 To account for potential sex-biases arising prior to the juvenile stage (i.e. sex allocation or  
232 sex-specific embryo mortality), we tested whether the hatching sex ratio deviated  
233 significantly from parity. Each population was analysed separately using a general linear  
234 mixed effect model with a binomial error distribution and a logit link function (R package  
235 “lme4”<sup>45</sup>). In this model, the response variable was chick sex, the fixed effect was the  
236 intercept, and brood identifier was included as a random factor to control for the non-  
237 independence of siblings from the same nest. Because plover chicks are precocial, post-hatch  
238 brood mixing can occur. Consequently, our dataset for analysing hatching sex ratio included  
239 only complete broods (i.e. with no missing chicks) that were captured at the nest on the same  
240 day of hatching (503 unique families with 1139 chicks, Supplementary Table 3). The fixed-  
241 effect intercepts of all populations were not significantly different from zero, indicating that  
242 hatching sex ratios did not deviate from parity (Fig. 2a).

### 243 *Matrix model structure*

244 We built two-sex post-breeding matrix models for each plover population that incorporated  
 245 two annual transitions denoting juveniles and adults (Fig. 1b). The projection of the matrix  
 246 for one annual time step ( $t$ ) is given by:

$$247 \quad \mathbf{n}_t = \mathbf{M}\mathbf{n}_{t-1} \quad (\text{Eq. 1})$$

248 where  $\mathbf{n}$  is a  $4 \times 1$  vector of the population distributed across the two life stages and two  
 249 sexes:

$$250 \quad \mathbf{n} = \begin{bmatrix} \text{♀ Juvenile} \\ \text{♀ Adult} \\ \text{♂ Juvenile} \\ \text{♂ Adult} \end{bmatrix} \quad (\text{Eq. 2})$$

251 and  $\mathbf{M}$  is expressed as a  $4 \times 4$  matrix:

$$252 \quad \mathbf{M} = \begin{bmatrix} 0 & R_{\text{♀}}(1 - \rho) & 0 & R_{\text{♂}}(1 - \rho) \\ \phi_{\text{♀J}} & \phi_{\text{♀A}} & 0 & 0 \\ 0 & R_{\text{♀}}\rho & 0 & R_{\text{♂}}\rho \\ 0 & 0 & \phi_{\text{♂J}} & \phi_{\text{♂A}} \end{bmatrix} \quad (\text{Eq. 3})$$

253 where transition probabilities ( $\phi$ ) between life stages are the apparent survival rates of female  
 254 (♀) and male (♂) juveniles ( $J$ ) and adults ( $A$ ). The hatching sex ratio ( $\rho$ ) describes the  
 255 probability of hatchlings being either male (i.e.  $\rho$ ) or female (i.e.  $1 - \rho$ ), and was estimated for  
 256 each population from our field data (see above). *Per capita* reproduction of females ( $R_{\text{♀}}$ ) and  
 257 males ( $R_{\text{♂}}$ ) is expressed through sex-specific mating functions used to link the sexes and  
 258 produce progeny for the following time step of the model given the relative frequencies of  
 259 each sex<sup>20</sup>. We used the harmonic mean mating function which accounts for sex-specific  
 260 frequency dependence<sup>46</sup>:

$$261 \quad R_{\text{♀}}(n_{\text{♂}}, n_{\text{♀}}) = \frac{kn_{\text{♂}}}{n_{\text{♂}} + n_{\text{♀}}h^{-1}}, \quad R_{\text{♂}}(n_{\text{♂}}, n_{\text{♀}}) = \frac{kn_{\text{♀}}}{n_{\text{♂}} + n_{\text{♀}}h^{-1}} \quad (\text{Eq. 4})$$

262 where  $k$  is the modal clutch size (3 in *C. nivosus*, *C. alexandrinus*, and *C. marginatus*, and 2  
 263 in *C. thoracicus* and *C. pecuarius*),  $h$  is an index of the annual number of mates acquired per

264 female (i.e. mating system, see below), and  $n_{\text{♀}}$  and  $n_{\text{♂}}$  are the densities of females and males,  
265 respectively, in each time step of the model.

### 266 *Quantifying mating system*

267 Demographic mating functions are traditionally expressed from the perspective of males<sup>46</sup>,  
268 whereby  $h$  is the average harem size (number of female mates per male). Under this  
269 definition,  $h > 1$  signifies polygyny,  $h = 1$  monogamy, and  $h < 1$  polyandry; ref. 47).  
270 Although both sexes can acquire multiple mates in a single breeding season, within-season  
271 polygamy is typically female biased in plovers. Thus, in accordance with the predominantly  
272 polyandrous or monogamous mating systems seen across these six populations,  $h$  was derived  
273 from the average annual number of mates per female ( $\mu$ ):

$$274 \quad \mu = \frac{1}{n} \sum_{i=1}^n \frac{m_i}{b_i} \quad (\text{Eq. 5})$$

275 where,  $n$  is the total number of females in a given population,  $b$  is the total number of years  
276 female  $i$  was seen breeding, and  $m$  is the total number of mating partners female  $i$  had over  $b$   
277 years. Thus, if  $\mu$  was less than or equal to one, females tended to have only one mating  
278 partner annually, and  $h$  was set to 1. Alternatively, if  $\mu$  was greater than 1, females were  
279 polygamous and  $h$  was calculated as the inverse of  $\mu$ :

$$280 \quad h = \begin{cases} 1, & \mu \leq 1 \\ \mu^{-1}, & \mu > 1 \end{cases} \quad (\text{Eq. 6})$$

281 Our dataset to estimate  $h$  for each population only included females for which we were  
282 confident of the identity of their mates, and had observed them in at least two reproductive  
283 attempts. In summary,  $\mu$  varied among populations (Supplementary Fig. 4), with *C. nivosus*  
284 ( $h = 0.82$ ), *C. alexandrinus* (Turkey;  $h = 0.85$ ), and *C. pecuarius* ( $h = 0.86$ ) having  
285 polyandrous mating systems and *C. alexandrinus* (Cape Verde), *C. thoracicus*, and *C.*  
286 *marginatus* all having monogamous mating systems (i.e.  $h = 1$ ).

287 *Estimation of the adult sex ratio*

288 We estimated ASR from the stable stage distribution ( $\mathbf{w}$ ) of the two-sex matrix model:

289 
$$\text{ASR} = \frac{w_{\sigma_A}}{w_{\sigma_A} + w_{\text{♀}_A}} \quad (\text{Eq. 7})$$

290 where  $w_{\sigma_A}$  and  $w_{\text{♀}_A}$  provide the proportion of the population composed of adult males and  
291 females, respectively, at equilibrium. To evaluate uncertainty in our estimate of ASR due to  
292 sampling and process variation in our apparent survival parameters, we implemented a  
293 bootstrapping procedure in which each iteration: (i) randomly sampled our mark-recapture  
294 data with replacement, (ii) ran the survival analyses described above, (iii) derived stage- and  
295 sex-specific estimates of apparent survival based on the model with the lowest  $\text{AIC}_C$  (i.e.  
296  $\Delta\text{AIC}_C = 0$ ; Supplementary Fig. 5), (iv) constructed the matrix model (Eq. 3) of these  
297 estimates, (v) derived the stable stage distribution through simulation of 1,000 time steps,  
298 then (vi) derived ASR from the stable stage distribution at equilibrium on the 1,000<sup>th</sup> time  
299 step. This approach ensured that parameter correlations within the matrix were retained for  
300 each bootstrap and it also accounted for non-linearity in the mating function. We ran 1,000  
301 iterations and evaluated the accuracy of our ASR estimate by determining the 95%  
302 confidence interval of its bootstrapped distribution. Note that our method estimated ASR as  
303 the asymptotic value predicted under the assumption that each population was at equilibrium  
304 and thus we could not evaluate inter-annual variation in asymptotic ASR. Nonetheless, our  
305 model-derived ASR estimate of the *C. nivosus* population falls within annual count-based  
306 ASR estimates of this population<sup>48</sup>, providing support that our method is robust. Count-based  
307 estimates of ASR from the remaining populations in our study are unfortunately  
308 uninformative due to our limited sample of marked individuals with known sex.

309 Our mark-recapture analysis was based on the encounter histories of 6,119 uniquely  
310 marked and molecularly sexed individuals (Supplementary Table 4). After implementing the

311 bootstrap procedure, we found that variation in the encounter probabilities of juveniles and  
312 adults was best explained by sex, year, and age in *C. nivosus*, *C. alexandrinus* (Turkey) and  
313 *C. pecuarius* (Supplementary Fig. 5). Encounter probability was best explained by age and  
314 year in *C. alexandrinus* (Cape Verde) and *C. marginatus* (Supplementary Fig. 5). In *C.*  
315 *thoracicus*, encounter probability was best explained by sex and year (Supplementary Fig. 5).  
316 Our mark-recapture data were not over-dispersed (Supplementary Table 4).

### 317 *Life table response experiment of ASR contributions*

318 Perturbation analyses provide information about the relative effect that each component of a  
319 matrix model has on the population-level response, in our case ASR. To assess how  
320 influential sex biases in parameters associated with each of the three life stages were on ASR  
321 dynamics, we employed a life-table response experiment (LTRE). A LTRE decomposes the  
322 difference in response between two or more "treatments" by weighting the difference in  
323 parameter values by the parameter's contribution to the response (i.e. its sensitivity), and  
324 summing over all parameters<sup>20</sup>. We compared the observed scenario ( $\mathbf{M}$ ), to a hypothetical  
325 scenario ( $\mathbf{M}_0$ ) whereby all female survival rates were set equal to the male rates (or *vice*  
326 *versa*) and the hatching sex ratio was unbiased (i.e.  $\rho = 0.5$ ). Thus, our LTRE identifies the  
327 drivers of ASR bias by decomposing the difference between the ASR predicted by our model  
328 and an unbiased ASR<sup>18</sup>.

329 The contributions (C) of lower-level demographic parameters ( $\theta$ ) were calculated  
330 following Veran and Beissinger<sup>18</sup>:

$$331 \quad C(\theta) = (\theta_{\sigma^{\text{a}}} - \theta_{\text{f}}) \times \frac{\partial \text{ASR}}{\partial \theta} \quad (\text{Eq. 8})$$

332 where  $\frac{\partial \text{ASR}}{\partial \theta}$  is the sensitivity of ASR to perturbations in the demographic rate  $\theta$  in matrix  $\mathbf{M}'$ ,  
333 which is a reference matrix "midway" between the two scenarios<sup>18</sup>:

334 
$$\mathbf{M}' = \frac{\mathbf{M} + \mathbf{M}_0}{2} \quad (\text{Eq. 9})$$

335 The two-sex mating function makes our model non-linear in the sense that the  
336 projection matrix, and specifically the fertility elements (Eq. 4), depends on sex-specific  
337 population structure. Perturbation analyses must therefore accommodate the indirect effects  
338 of parameter perturbations on population response via their effects on population structure,  
339 such as the relative abundance of males and females which can affect mating dynamics and  
340 fecundity. To estimate the sensitivities of the ASR to vital rate parameters, we employed  
341 numerical methods that independently perturbed each parameter of the matrix, simulated the  
342 model through 1,000 time steps, and calculated ASR at equilibrium. This produced  
343 parameter-specific splines from which  $\frac{\partial \text{ASR}}{\partial \theta}$  could be derived. This approach appropriately  
344 accounts for the non-linear feedbacks between vital rates and population structure, though it  
345 does not isolate the contribution of this feedback<sup>47,49</sup>.

346 Our LTRE revealed that across all populations, sex differences in juvenile apparent  
347 survival made the largest overall contribution to ASR bias (Supplementary Fig. 1). Likewise,  
348 for all populations, sex biases at hatching and in mating system had negligible effects on  
349 ASR variation (Supplementary Fig. 1).

### 350 *Evaluating the association between ASR bias and parental cooperation*

351 To test the relationship between ASR bias and parental cooperation, we conducted a  
352 regression analysis of the following quadratic model:

353 
$$P_{\sigma \uparrow \text{♀}} = \beta_0 + \beta_1 A + \beta_2 A^2 + \varepsilon \quad (\text{Eq. 11})$$

354 where  $P_{\sigma \uparrow \text{♀}}$  is the proportion of families exhibiting parental cooperation,  $\beta_i$  are the  
355 regression parameters (i.e. intercept and coefficient),  $A$  is the ASR, and  $\varepsilon$  is random error. We  
356 chose a quadratic model *a priori* as we expected maximum parental cooperation at unbiased  
357 ASR but minimum cooperation at both male- and female-biased ASRs (see inset in Fig. 3a).

358 This relationship was assessed with a bootstrap procedure that incorporated uncertainty in our  
359 estimates of ASR and parental care. Each iteration of the bootstrap (i) randomly sampled an  
360 ASR value from the 95% confidence interval of each population shown in Fig. 2b, (ii)  
361 randomly sampled a parental care value from the truncated 95% confidence interval of each  
362 population shown in Supplementary Table 2, then (iii) fitted the regression model. We ran  
363 1,000 iterations of the bootstrap and evaluated overall relationships by visualizing the central  
364 tendency of the regressions. We also evaluated the relationship between ASR variation and  
365 male-only or female-only care using a similar bootstrap procedure of the following models:

$$366 \quad P_{\sigma} = \beta_0 + \beta_1^A + \varepsilon \quad , \quad P_{\varphi} = \beta_0 - \beta_1^A + \varepsilon \quad \text{(Eq. 12)}$$

367 where  $P_{\sigma}$  and  $P_{\varphi}$  are the proportions of families exhibiting male-only or female-only care,  
368 respectively. In this case, we chose exponential models *a priori* as we expected a non-linear  
369 increase in uni-parental care by the abundant sex under biased ASR (Supplementary Fig. 3a).  
370 This analysis demonstrated that male-only care tended to be more common in populations  
371 with male-biased ASR (mean  $\beta_1 = 0.682$  [-0.366, 1.555 95% CI]) and female-only care  
372 tended to be more common in female-biased populations (mean  $\beta_1 = -0.205$  [-0.502, 0.037  
373 95% CI]; Supplementary Fig. 3b). However, the overall magnitude of the effect of ASR  
374 variation on female-only care was less than that of male-only care.

### 375 *Data and code availability*

376 All of our modelling and statistical analyses were conducted using R version *Kite-eating*  
377 *Tree*<sup>50</sup> with significance testing evaluated at  $\alpha = 0.05$ . We provide all computer code and  
378 documentation as a PDF file written in RMarkdown (Supplementary Material A) together  
379 with all the raw datasets needed to reproduce our modelling and analyses (Supplementary  
380 Material B). These can be downloaded from our GitHub repository:  
381 [https://github.com/leberhartphillips/Plover\\_ASR\\_Matrix\\_Modeling](https://github.com/leberhartphillips/Plover_ASR_Matrix_Modeling).



382 **References:**

- 383 1. Arbuthnott, J. An argument for divine providence, taken from the constant regularity  
384 observ'd in the births of both sexes. *Phil. Trans.* **27**, 186–190 (1710).
- 385 2. Darwin, C. *The descent of man and selection in relation to sex*. Murray (1871).
- 386 3. Donald, P. F. Adult sex ratios in wild bird populations. *Ibis* **149**, 671–692 (2007).
- 387 4. Wedekind, C. *et al.* Persistent unequal sex ratio in a population of grayling  
388 (salmonidae) and possible role of temperature increase. *Conserv. Biol.* **27**, 229–234  
389 (2013).
- 390 5. Bókony, V., Kövér, S., Nemesházi, E., Liker, A. & Székely, T. Climate-driven shifts  
391 in adult sex ratios via sex reversals: the type of sex determination matters. *Phil. Trans.*  
392 10.1098/rstb.2016.0325 (2017).
- 393 6. Petry, W. K. *et al.* Sex-specific responses to climate change in plants alter population  
394 sex ratio and performance. *Science* **353**, 69–71 (2016).
- 395 7. Liker, A., Freckleton, R. P. & Székely, T. Divorce and infidelity are associated with  
396 skewed adult sex ratios in birds. *Curr. Biol.* **24**, 880–884 (2014).
- 397 8. Remeš, V., Freckleton, R. P., Tökölyi, J., Liker, A. & Székely, T. The evolution of  
398 parental cooperation in birds. *P. Natl. Acad. Sci. USA* **112**, 13603–13608 (2015).
- 399 9. Schacht, R., Rauch, K. L. & Borgerhoff Mulder, M. Too many men: the violence  
400 problem? *Trends Ecol. Evol.* **29**, 214–222 (2014).
- 401 10. Adimora, A. A. & Schoenbach, V. J. Social context, sexual networks, and racial  
402 disparities in rates of sexually transmitted infections. *J. Infect. Dis.* **191** Suppl 1,  
403 S115–22 (2005).
- 404 11. Griskevicius, V. *et al.* The financial consequences of too many men: sex ratio effects  
405 on saving, borrowing, and spending. *J. Pers. Soc. Psychol.* **102**, 69–80 (2012).
- 406 12. Székely, T., Weissing, F. J. & Komdeur, J. Adult sex ratio variation: implications for  
407 breeding system evolution. *J. Evolution. Biol.* **27**, 1500–1512 (2014).
- 408 13. Fisher, R. A. *The genetical theory of natural selection*. Oxford University Press  
409 (1930).
- 410 14. Trivers, R. L. & Willard, D. E. Natural selection of parental ability to vary the sex  
411 ratio of offspring. *Science* **179**, 90–92 (1973).
- 412 15. Booksmythe, I., Mautz, B., Davis, J., Nakagawa, S. & Jennions, M. D. Facultative  
413 adjustment of the offspring sex ratio and male attractiveness: a systematic review and  
414 meta-analysis. *Biol. Rev.* **92**, 108–134 (2017).

- 415 16. Székely, T., Thomas, G. H. & Cuthill, I. C. Sexual conflict, ecology, and breeding  
416 systems in shorebirds. *BioScience* **56**, 801–808 (2006).
- 417 17. Carmona-Isunza, M. C., Küpper, C., Serrano-Meneses, M. A. & Székely, T.  
418 Courtship behavior differs between monogamous and polygamous plovers. *Behav.*  
419 *Ecol. Sociobiol.* **69**, 2035–2042 (2015).
- 420 18. Veran, S. & Beissinger, S. R. Demographic origins of skewed operational and adult  
421 sex ratios: perturbation analyses of two-sex models. *Ecol. Lett.* **12**, 129–143 (2009).
- 422 19. Lebreton, J. D., Burnham, K. P., Clobert, J. & Anderson, D. R. Modeling survival and  
423 testing biological hypotheses using marked animals: a unified approach with case  
424 studies. *Ecol. Monogr.* **62**, 67–118 (1992).
- 425 20. Caswell, H. *Matrix population models: construction, analysis, and interpretation.*  
426 Sinauer Associates, Inc. (2001).
- 427 21. Emlen, S. T. & Oring, L. W. Ecology, sexual selection, and the evolution of mating  
428 systems. *Science* **197**, 215–223 (1977).
- 429 22. McNamara, J. M., Székely, T., Webb, J. N. & Houston, A. I. A dynamic game-  
430 theoretic model of parental care. *J. Theor. Biol.* **205**, 605–623 (2000).
- 431 23. Parra, J. E., Beltrán, M., Zefania, S., Remedios, dos, N. & Székely, T. Experimental  
432 assessment of mating opportunities in three shorebird species. *Anim. Behav.* **90**, 83–  
433 90 (2014).
- 434 24. Amat, J. A., Visser, G. H., Hurtado, A. P. & Arroyo, G. M. Brood desertion by female  
435 shorebirds: a test of the differential parental capacity hypothesis on Kentish plovers.  
436 *P. Roy. Soc. B-Biol. Sci.* **267**, 2171–2176 (2000).
- 437 25. Fromhage, L. & Jennions, M. D. Coevolution of parental investment and sexually  
438 selected traits drives sex-role divergence. *Nat. Commun.* **7**, 12517 (2016).
- 439 26. Clarke, A. L., Sæther, B.-E. & Røskaft, E. Sex biases in avian dispersal: A  
440 Reappraisal. *Oikos* **79**, 429–438 (1997).
- 441 27. Küpper, C. *et al.* High gene flow on a continental scale in the polyandrous Kentish  
442 plover *Charadrius alexandrinus*. *Mol. Ecol.* **21**, 5864–5879 (2012).
- 443 28. Eberhart-Phillips, L. J. *et al.* Contrasting genetic diversity and population structure  
444 among three sympatric Madagascan shorebirds: parallels with rarity, endemism, and  
445 dispersal. *Ecol. Evol.* **5**, 997–1010 (2015).
- 446 29. Eberhart-Phillips, L. J. *et al.* Sex-specific early survival drives adult sex ratio bias in  
447 snowy plovers and impacts mating system and population growth. *P. Natl. Acad. Sci.*  
448 *USA* **114**, E5474–E5481 (2017).

- 449 30. Stenzel, L. E. *et al.* Male-skewed adult sex ratio, survival, mating opportunity and  
450 annual productivity in the snowy plover *Charadrius alexandrinus*. *Ibis* **153**, 312–322  
451 (2011).
- 452 31. Küpper, C. *et al.* Heterozygosity-fitness correlations of conserved microsatellite  
453 markers in Kentish plovers *Charadrius alexandrinus*. *Mol. Ecol.* **19**, 5172–5185  
454 (2010).
- 455 32. Kanfi, Y. *et al.* The sirtuin SIRT6 regulates lifespan in male mice. *Nature* **483**, 218–  
456 221 (2012).
- 457 33. Clutton-Brock, T. H., Albon, S. D. & Guinness, F. E. Parental investment and sex  
458 differences in juvenile mortality in birds and mammals. *Nature* **313**, 131–133 (1985).
- 459 34. dos Remedios, N., Székely, T., Küpper, C., Lee, P. L. M. & Kosztolányi, A.  
460 Ontogenic differences in sexual size dimorphism across four plover populations. *Ibis*  
461 **157**, 590–600 (2015).
- 462 35. Zefania, S. *et al.* Cryptic sexual size dimorphism in Malagasy plovers *Charadrius*  
463 *spp.* *Ostrich* **81**, 173–178 (2010).
- 464 36. Székely, T., Liker, A., Freckleton, R. P., Fichtel, C. & Kappeler, P. M. Sex-biased  
465 survival predicts adult sex ratio variation in wild birds. *P. Roy. Soc. B-Biol. Sci.* **281**,  
466 20140342 (2014).
- 467 37. Kokko, H. & Jennions, M. Parental investment, sexual selection and sex ratios. *J.*  
468 *Evolution. Biol.* **21**, 919–948 (2008).
- 469 38. Hall, L. K. & Cavitt, J. F. Comparative study of trapping methods for ground-nesting  
470 shorebirds. *Waterbirds* **35**, 342–346 (2012).
- 471 39. Dawson, D. A. *et al.* Gene order and recombination rate in homologous chromosome  
472 regions of the chicken and a passerine bird. *Mol. Biol. Evol.* **24**, 1537–1552 (2007).
- 473 40. Küpper, C. *et al.* Characterization of 36 polymorphic microsatellite loci in the Kentish  
474 plover (*Charadrius alexandrinus*) including two sex-linked loci and their  
475 amplification in four other *Charadrius* species. *Mol. Ecol. Notes* **7**, 35–39 (2007).
- 476 41. Székely, T. & Cuthill, I. C. Trade-off between mating opportunities and parental care:  
477 brood desertion by female Kentish plovers. *P. Roy. Soc. B-Biol. Sci.* **267**, 2087–2092  
478 (2000).
- 479 42. Sison, C. P. & Glaz, J. Simultaneous confidence intervals and sample size  
480 determination for multinomial proportions. *J. Am. Stat. Assoc.* **90**, 366–369 (1995).

- 481 43. Laake, J. RMark: an R interface for analysis of capture-recapture data with MARK.  
482 *AFSC Processed Report* (2013).
- 483 44. White, G. C. & Burnham, K. P. Program MARK: survival estimation from  
484 populations of marked animals. *Bird Study* **46**, S120–S139 (1999).
- 485 45. Bates, D., Mächler, M., Bolker, B. & Walker, S. Fitting linear mixed-effects models  
486 using lme4. *J. Stat. Softw.* **67**, 1–48 (2015).
- 487 46. Miller, T. E. X. & Inouye, B. D. Confronting two-sex demographic models with data.  
488 *Ecology* **92**, 2141–2151 (2011).
- 489 47. Caswell, H. Perturbation analysis of nonlinear matrix population models. *Demogr.*  
490 *Res.* **18**, 59–116 (2008).
- 491 48. Carmona-Isunza, M. C. *et al.* Adult sex ratio and operational sex ratio exhibit  
492 different temporal dynamics in the wild. *Behav. Ecol.* **28**, 523–532 (2017).
- 493 49. Jenouvrier, S., Caswell, H., Barbraud, C. & Weimerskirch, H. Mating behavior,  
494 population growth, and the operational sex ratio: a periodic two-sex model approach.  
495 *Am. Nat.* **175**, 739–752 (2010).
- 496 50. R Core Team. R: a language and environment for statistical computing. (2017).  
497 doi:ISBN 3-900051-07-0

498 **Acknowledgements:**

499 Fieldwork was permitted and ethically approved by federal authorities in Cape Verde  
500 (Direcção Geral do Ambiente, DGA), Mexico (Secretaría de Medio Ambiente y Recursos  
501 Naturales, SEMARNAT), Madagascar (Ministry of Environment, Forests, and Tourism of  
502 the Republic of Madagascar), and Turkey (Turkish Ministry of Environment). Financial  
503 support was provided by a Deutsche Forschungsgemeinschaft (DFG) doctoral fellowship to  
504 LE-P and supervised by OK, JH, and TS (GZ: KR 2089/9-1). Fieldwork was funded by  
505 Sonoran Joint Venture, Tracy Aviary Conservation Fund, Convocatoria de Investigación  
506 Científica Básica (CONACyT, Grant no. 157570), Fundação Maio Biodiversidade (FMB),  
507 DGA, Camara Municipal do Maio, DFG Mercator Visiting Professorship awarded to TS,  
508 Natural Environment Research Council grant (GR3/10957), Biotechnology and Biological  
509 Sciences Research Council (BBS/B/05788) to ICC and TS. MCC-I: CONACyT (PhD  
510 scholarship 216052/311485). OV: Hungarian Eötvös Scholarship (Tempus Public Foundation  
511 MÁEÖ2016\_15/76740), Campus Mundi scholarship (CMP-69- 2/2016), and Hungarian  
512 Research Fund (OTKA #K113108). AK: János Bolyai Research Scholarship of the  
513 Hungarian Academy of Sciences and NKFIH grant (K112670). TB: Leverhulme Fellowship.  
514 TS: NKFIH-2558-1/2015 and the Wissenschaftskollegium zu Berlin. Our manuscript  
515 benefitted from the constructive comments of S. Beissinger, W. Forstmeier, M. Galipaud, M.  
516 Jennions, P. Korsten, A. Shah, M. Stoffel, and three anonymous reviewers. Original plover  
517 illustrations by LE-P. We thank N. dos Remedios and K. Maher for molecular work and we  
518 are grateful for the generous assistance of countless students, volunteers, and colleagues who  
519 aided with fieldwork.

520 **Author contributions:**

521 L.E.-P., T.S., J.I.H., and O.K. conceived the study. L.E.-P., C.K., M.C.C.-I., O.V., S.Z., A.K.,  
522 M.C.L, I.C.C., and T.S. planned and collected the field data. L.E.-P., C.K., J.I.H., and T.B.  
523 performed or supervised the molecular sexing. L.E.-P., T.M., and O.K. implemented the  
524 demographic modelling. L.E.-P. wrote the manuscript and the RMarkdown file. All authors  
525 contributed substantially to revisions of the paper.

526 **Figure legends**

527 **Figure 1. Modelling the demographic pathway of adult sex ratio bias among plovers**

528 **worldwide.** (a) Location of the six study populations. *C. pecuarius*, *C. marginatus*, and *C.*  
529 *thoracicus* breed sympatrically in south-western Madagascar, whereas the two populations of  
530 *C. alexandrinus* are geographically disparate, inhabiting southern Turkey and the Cape Verde  
531 archipelago. The studied *C. nivosus* population is located on the Pacific coast of Mexico. All  
532 populations inhabit saltmarsh or seashore habitats characterized by open and flat substrates.  
533 (b) Schematic of the stage- and sex-specific demographic transitions of individuals from  
534 hatching until adulthood and their contributions to the adult sex ratio (depicted here is *C.*  
535 *nivosus*). The hatching sex ratio ( $\rho$ , proportion of male hatchlings) serves as a proxy for the  
536 primary sex ratio and allocates progeny to the male or female juvenile stage. During the  
537 juvenile ('juv') stage, a subset of this progeny will survive ( $\phi$ ) to recruit and remain as adults  
538 ('ad'). Dotted clusters illustrate how a cohort is shaped through these sex-specific  
539 demographic transitions to derive the adult sex ratio (mortality indicated by grey dots). The  
540 reproduction function,  $R(n_{\text{♂}}, n_{\text{♀}})$ , is dependent on mating system and the frequency of  
541 available mates (see *Methods* for details).

542 **Figure 2. Inter- and intra-specific variation in sex-biased demography.** (a) Hatching sex  
543 ratios of 'successful clutches (proportion of chicks that are male) are shown as point estimates  
544 ( $\rho \pm 95\%$  CI; left y-axis), and sex bias (i.e. difference between males and females) in annual  
545 apparent survival rates of juveniles ( $\phi_{\text{juv}}$ ) and adults ( $\phi_{\text{ad}}$ ) are shown as violin plots (right y-  
546 axis). Horizontal lines within violin plots indicate the median and interquartile ranges of the  
547 bootstrapped estimates (see *Methods* for details). (b) Bootstrap distributions of the derived  
548 ASRs based on the sex- and stage-specific rates shown in panel a. Vertical bars on the right  
549 side of histograms indicate the 95% CI of ASRs based on 1,000 iterations of the bootstrap

550 (mean ASR [95% CI]: *C. nivosus* = 0.644 [0.499, 0.778], *C. alexandrinus* [Turkey] = 0.586  
551 [0.510, 0.652], *C. alexandrinus* [Cape Verde] = 0.469 [0.396, 0.543], *C. thoracicus* = 0.421  
552 [0.171, 0.681], *C. marginatus* = 0.430 [0.340, 0.522], *C. pecuarius* = 0.386 [0.289, 0.498].

553 **Figure 3. Relationship between parental cooperation and the adult sex ratio.** (a) Faint  
554 white lines illustrate each iteration of the bootstrap, which randomly sampled an adult sex  
555 ratio and parental care estimate from each population's uncertainty distribution and fitted  
556 them to the *a priori* quadratic model (shown in inset, Eq. 11). (b) Proportion of monitored  
557 plover families that exhibit parental cooperation (white) or single-parent care by males  
558 (green) or females (orange). Sample sizes reflect number of families monitored per  
559 population.

560

Figure 1

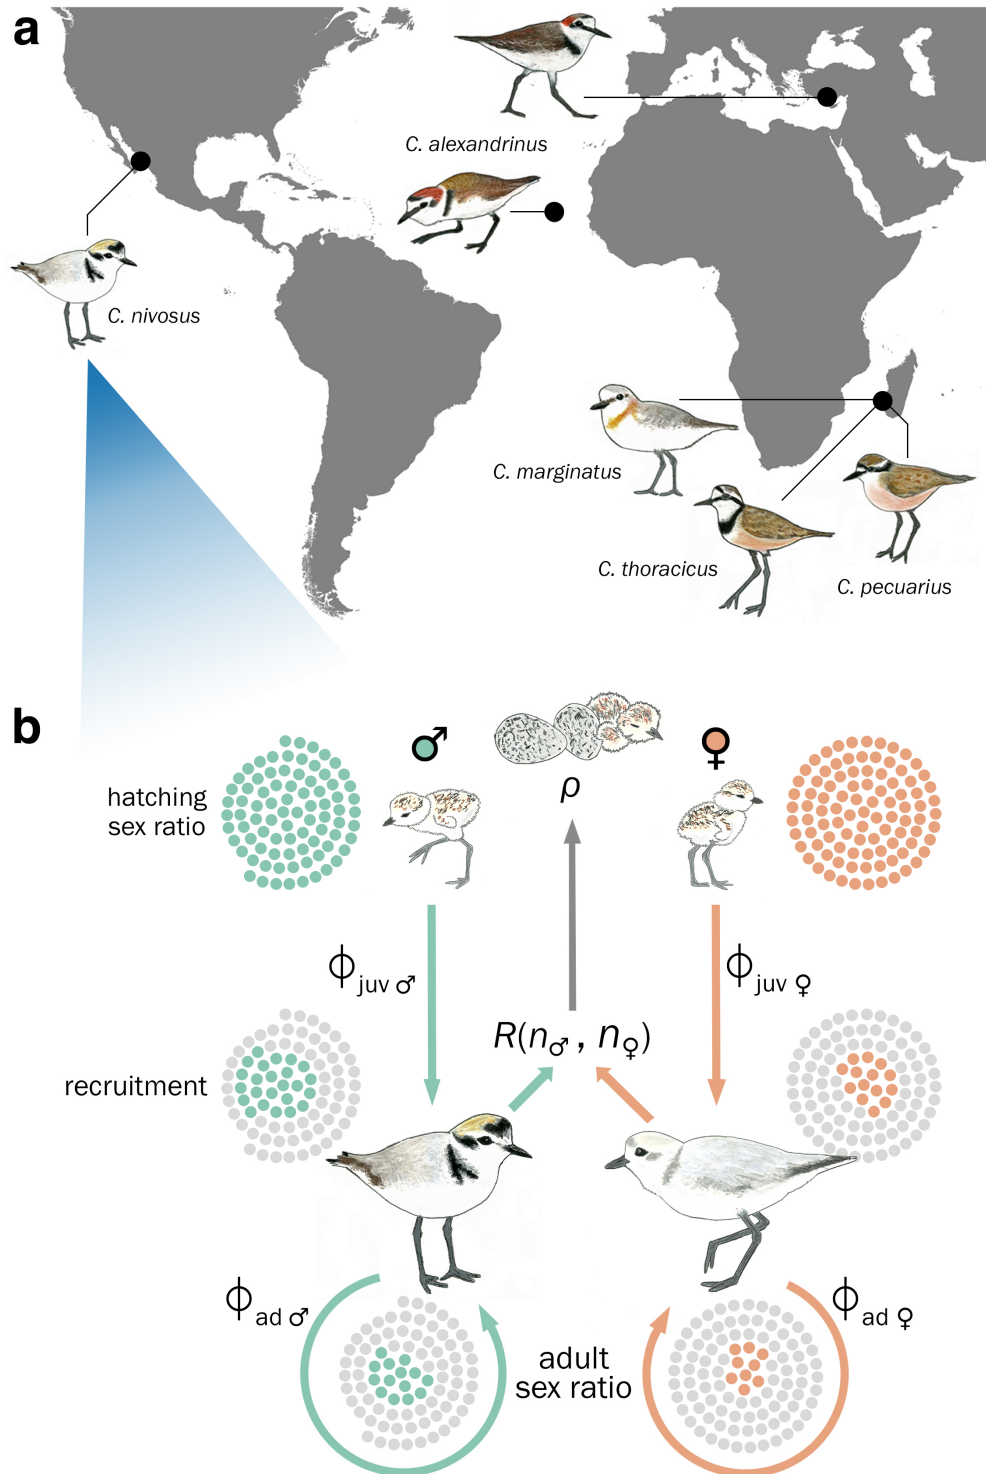



561

Figure 2

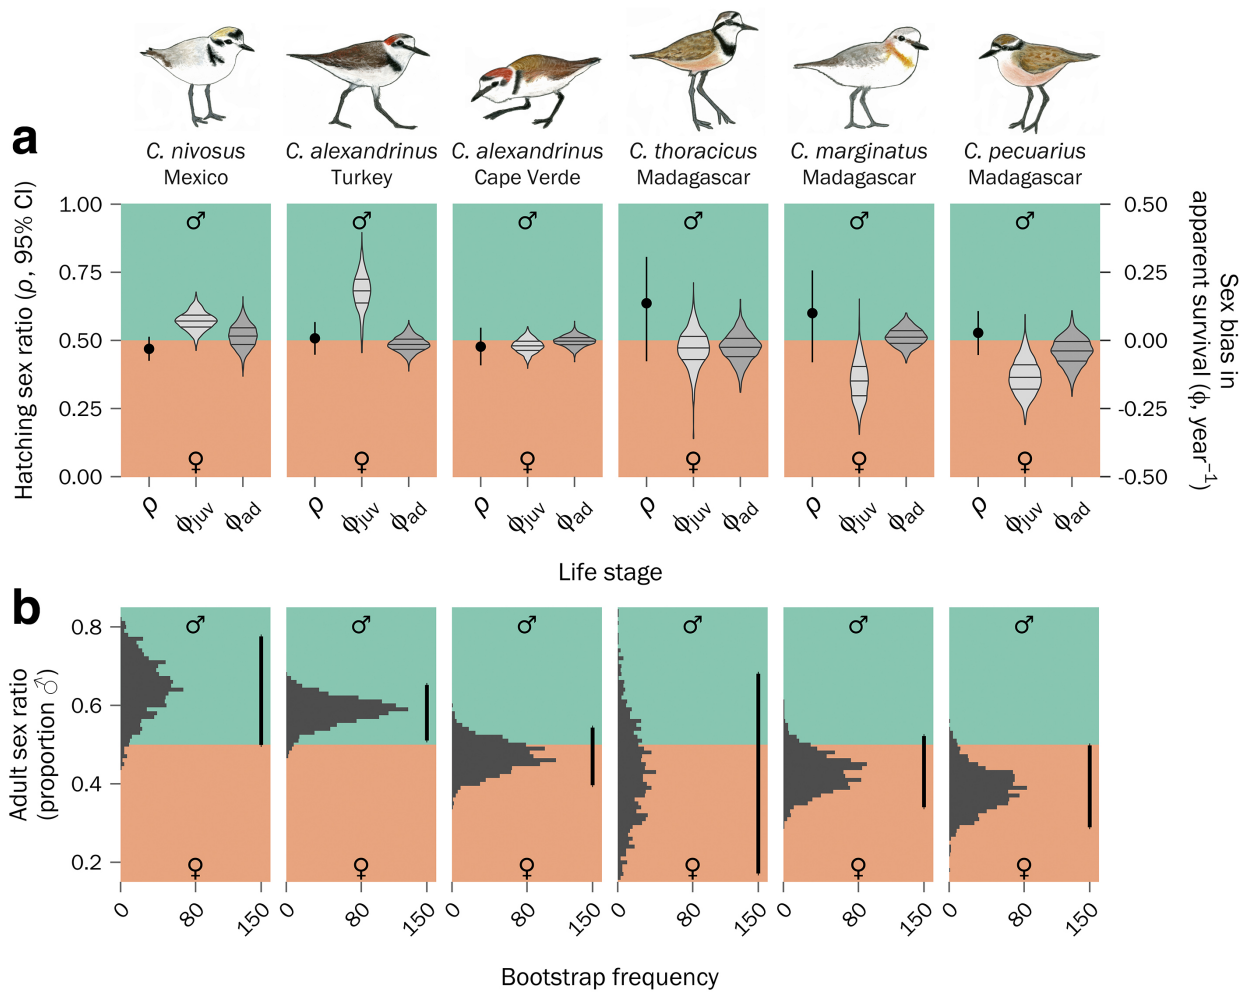

562

Figure 3

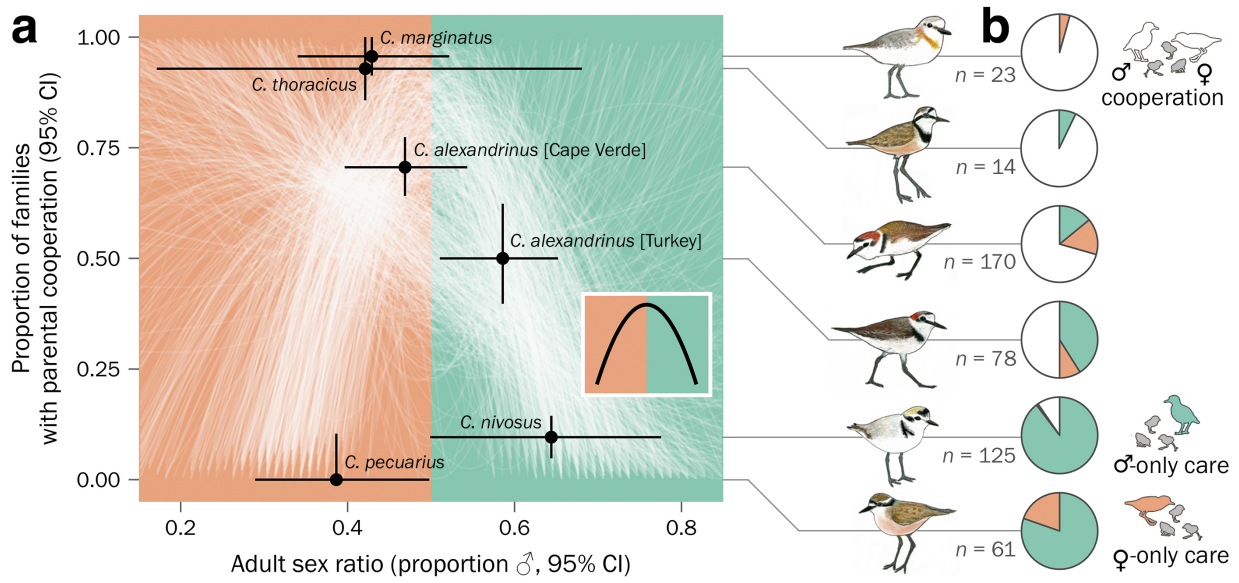

563 **Supplementary Information**

564 *Supplementary Tables*

565 **Supplementary Table 1. Study site metadata: geographic location (see Fig. 1) and**

566 **duration of monitoring effort.**

| <b>Species</b>         | <b>Population</b> | <b>Latitude</b> | <b>Longitude</b> | <b>Years<br/>monitored</b> |
|------------------------|-------------------|-----------------|------------------|----------------------------|
| <i>C. nivosus</i>      | Mexico            | 23°54'N         | 106°57'W         | 2006-2012                  |
| <i>C. alexandrinus</i> | Turkey            | 36°43'N         | 35°03'E          | 1996-2001                  |
|                        | Cape Verde        | 15°8'N          | 23°13'W          | 2007-2015                  |
| <i>C. thoracicus</i>   | Madagascar        | 22°6'S          | 43°15'E          | 2009-2015                  |
| <i>C. marginatus</i>   | Madagascar        |                 |                  | 2009-2015                  |
| <i>C. pecuarius</i>    | Madagascar        |                 |                  | 2009-2015                  |
|                        |                   |                 |                  | 43 years                   |

567 **Supplementary Table 2. Summary of parental care sex roles.** Percentages reflect the  
568 within-population proportion of families with a given parental care system.

| Species                | Population | Bi-parental   | Female-only care | Male-only care | <i>n</i> |
|------------------------|------------|---------------|------------------|----------------|----------|
|                        |            | [95% CI]      | [95% CI]         | [95% CI]       |          |
| <i>C. nivosus</i>      | Mexico     | 9% [5, 14]    | 1% [0, 6]        | 90% [85, 94]   | 125      |
| <i>C. alexandrinus</i> | Turkey     | 50% [40, 62]  | 9% [0, 21]       | 41% [31, 53]   | 78       |
|                        | Cape Verde | 71% [64, 77]  | 15% [9, 22]      | 14% [8, 21]    | 170      |
| <i>C. thoracicus</i>   | Madagascar | 93% [86, 100] | 0% [0, 12]       | 7% [0, 36]     | 14       |
| <i>C. marginatus</i>   | Madagascar | 96% [91, 100] | 4% [0, 12]       | 0% [0, 7]      | 23       |
| <i>C. pecuarius</i>    | Madagascar | 0% [0, 10]    | 20% [11, 30]     | 80% [72, 91]   | 61       |
|                        |            |               |                  |                | 471      |

569 **Supplementary Table 3. Summary of hatching sex ratio data**, where  $\rho$  is the average  
570 hatching sex ratio (expressed as the proportion of hatchlings in a brood that are male) and  
571 95% CIs are calculated using a binomial distribution.

| <b>Species</b>         | <b>Population</b> | $N_{\text{Families}}$ | $N_{\text{Hatchlings}}$ | $\rho$ | <b>95% CI</b>  |
|------------------------|-------------------|-----------------------|-------------------------|--------|----------------|
| <i>C. nivosus</i>      | Mexico            | 198                   | 484                     | 0.469  | [0.425, 0.514] |
| <i>C. alexandrinus</i> | Turkey            | 102                   | 262                     | 0.508  | [0.447, 0.568] |
|                        | Cape Verde        | 107                   | 197                     | 0.477  | [0.408, 0.547] |
| <i>C. thoracicus</i>   | Madagascar        | 11                    | 22                      | 0.636  | [0.423, 0.807] |
| <i>C. marginatus</i>   | Madagascar        | 13                    | 30                      | 0.600  | [0.419, 0.757] |
| <i>C. pecuarius</i>    | Madagascar        | 72                    | 144                     | 0.528  | [0.446, 0.757] |

572 **Supplementary Table 4. Sample size and over-dispersion summary of mark-recapture**  
573 **dataset used to estimate apparent survival.**

| Species                | Population | Juveniles <sup>1</sup> |     | Adults <sup>2</sup> |     | Total<br>individuals | Median $\hat{c}$ |
|------------------------|------------|------------------------|-----|---------------------|-----|----------------------|------------------|
|                        |            | ♀                      | ♂   | ♀                   | ♂   |                      |                  |
| <i>C. nivosus</i>      | Mexico     | 438                    | 388 | 221                 | 212 | 1358                 | 1.70             |
| <i>C. alexandrinus</i> | Turkey     | 310                    | 293 | 557                 | 504 | 1664                 | 1.49             |
|                        | Cape Verde | 377                    | 383 | 254                 | 213 | 1227                 | 1.37             |
| <i>C. thoracicus</i>   | Madagascar | 38                     | 56  | 83                  | 68  | 245                  | 2.72             |
| <i>C. marginatus</i>   | Madagascar | 76                     | 96  | 99                  | 95  | 366                  | 1.31             |
| <i>C. pecuarius</i>    | Madagascar | 274                    | 286 | 382                 | 416 | 1358                 | 1.77             |
|                        |            |                        |     |                     |     | 6119                 |                  |

574 <sup>1</sup>Individuals first marked as hatchlings (i.e. known age).

575 <sup>2</sup>Individuals first marked as breeding adults (i.e. 1+ years old).

576 **Supplementary Figure legends**

577 **Supplementary Figure 1. Contributions of sex-specific parameters to adult sex ratio**

578 **bias.** These results are based on a life-table response experiment (LTRE) that compared the  
579 empirically-derived sex-specific model to hypothetical scenarios with no sex differences in  
580 demographic rates (top panel: female-only rates, bottom panel: male-only rates). ASR is the  
581 proportion of the adult population that is male, thus changes in female-biased parameters  
582 have a negative effect on ASR and consequently their LTRE statistics are negative. Notation:  
583  $h$  = mating system index (Eq. 6),  $\rho$  = hatching sex ratio, Juvenile = sex-biased apparent  
584 survival of juveniles, Adult = sex-biased apparent survival of adults.

585 **Supplementary Figure 2. Interspecific variation in sex-specific mating opportunities**

586 **among three plover species.** Experimental assessment of sex-differences in remating times  
587 in three of the six populations analysed indicate that *C. alexandrinus* males in Tuzla, Turkey  
588 ( $n = 19$ ) take longer to find a mate than females ( $n = 15$ ) after induced divorce. This trend is  
589 reversed in *C. pecuarius* ( $n_{\delta} = 10, n_{\text{♀}} = 6$ ) whereas there are no differences in the *C.*  
590 *marginatus* ( $n_{\delta} = 6, n_{\text{♀}} = 6$ ). Significant sex-differences are indicated by asterisks (\*\*\*:  $P <$   
591  $0.001$ , \*:  $P < 0.05$ , n.s.:  $P > 0.05$ ). Figure adapted from Parra et al. (ref. 23).

592 **Supplementary Figure 3. Relationship between uni-parental care and the adult sex**

593 **ratio. (a)** Predicted prevalence of male-only care (left panel) or female-only care (right  
594 panel) in response to adult sex ratio variation. **(b)** Observed relationship between parental  
595 care strategies and adult sex ratio estimates among the six studied populations. Faint white  
596 lines illustrate each iteration of the bootstrap, which randomly sampled an adult sex ratio and  
597 parental care estimate from each population's uncertainty distribution and fitted them to the *a*  
598 *priori* exponential model (Eq. 12). **(c)** Proportion of monitored plover families that exhibit

599 parental cooperation (white) or uni-parental care by males (green) or females (orange).

600 Sample sizes reflect the number of families monitored per population, circled numbers

601 correspond to the data point labels shown in panel b.

602 **Supplementary Figure 4. Variation in annual female mating rates ( $\mu$ ) among the six**

603 **plover populations.** Sample sizes indicate the number of individual females in each

604 population that had at least two recorded breeding attempts with identified male(s) during the

605 study. Values below one represent females that bred over multiple years with the same mate

606 (i.e. between season monogamy), whereas values greater than one represent females that have

607 had more than one mate per year (i.e. within season polyandry). Values equal to one

608 represent individuals that have had one mate per year, but have switched mates between years

609 (i.e. between season polyandry but within season monogamy). White data points illustrate

610 individual females, and black points are population averages ( $\mu \pm 1$  SD).

611 **Supplementary Figure 5. Summary statistics of bootstrapped mark-recapture modelling**

612 **of juvenile and adult encounter probability.** Left panels illustrate variation in  $AIC_C w_i$ .

613 Right panels illustrate variation in  $\Delta AIC_C$ . Model structure of encounter probability ( $p$ ) is

614 shown as labels on the y-axes. See *Methods* for further details.

615 **Supplementary Movie 1**

616 **Field methods for capturing and monitoring plovers** (11min 46sec):

617 <https://drive.google.com/file/d/0B4RO-u-356yiRjNSQ0RUMWpxYIU/view?usp=sharing>



618

Supplementary Figure 1

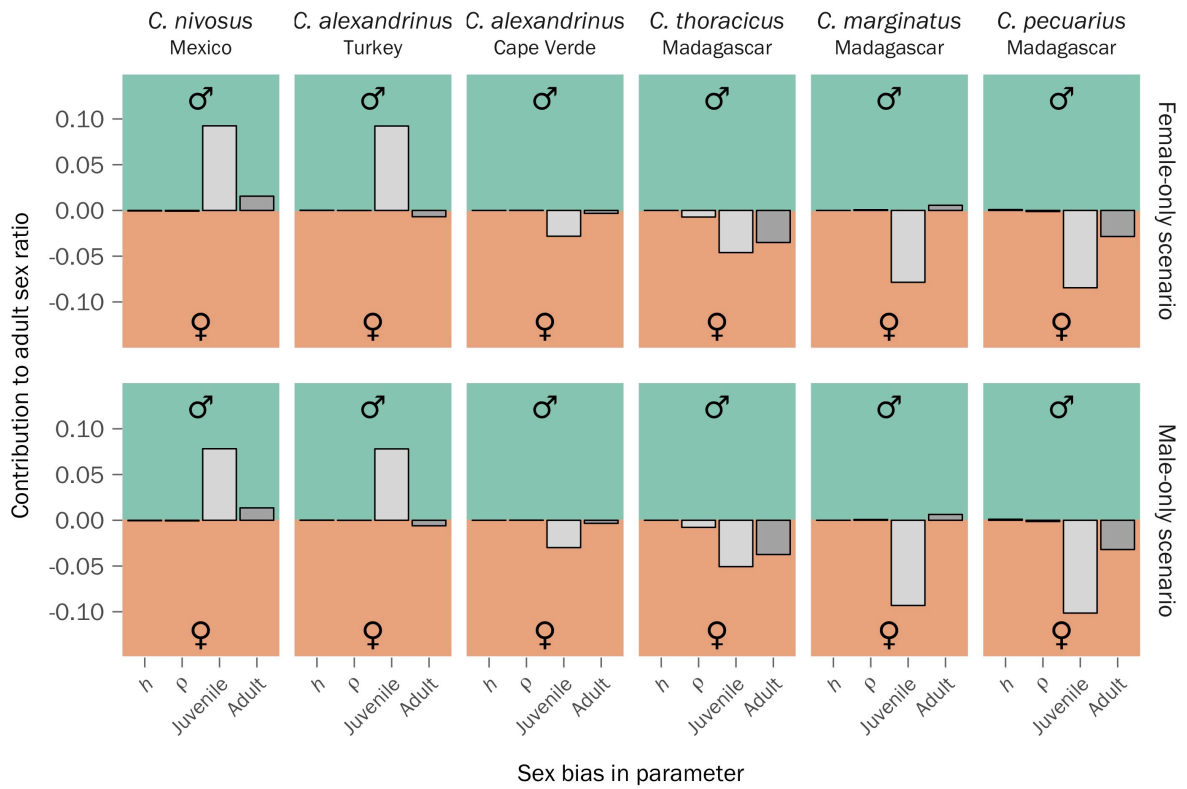

619

**Supplementary Figure 2**

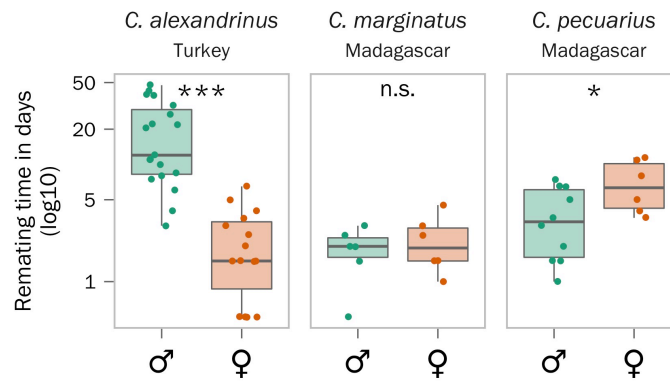

620

Supplementary Figure 3

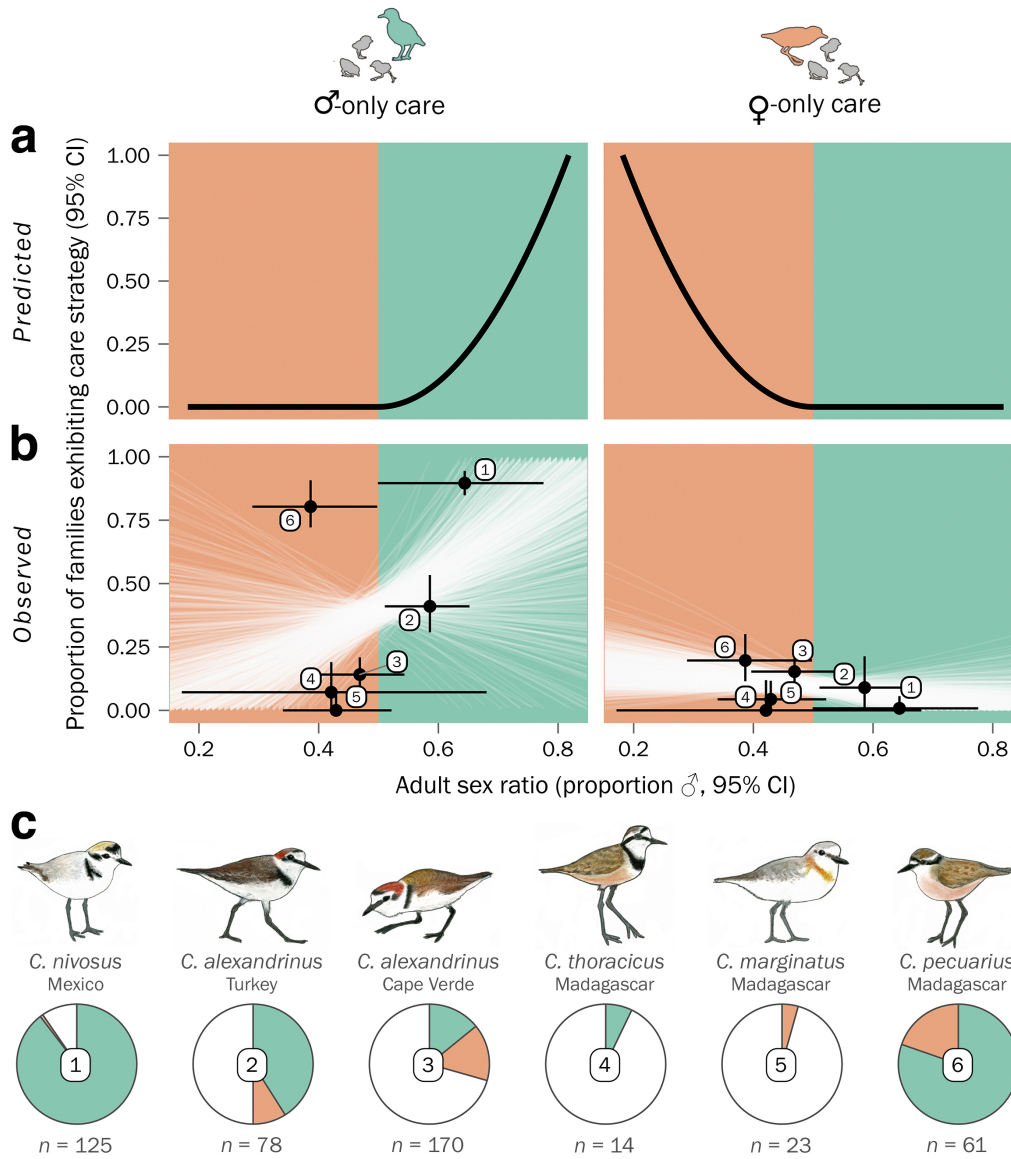

621

Supplementary Figure 4

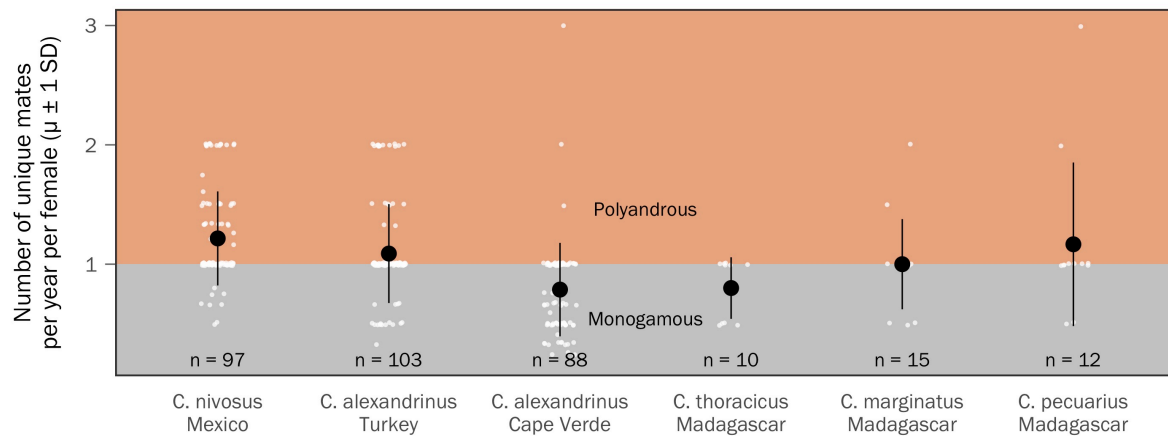

622

### Supplementary Figure 5

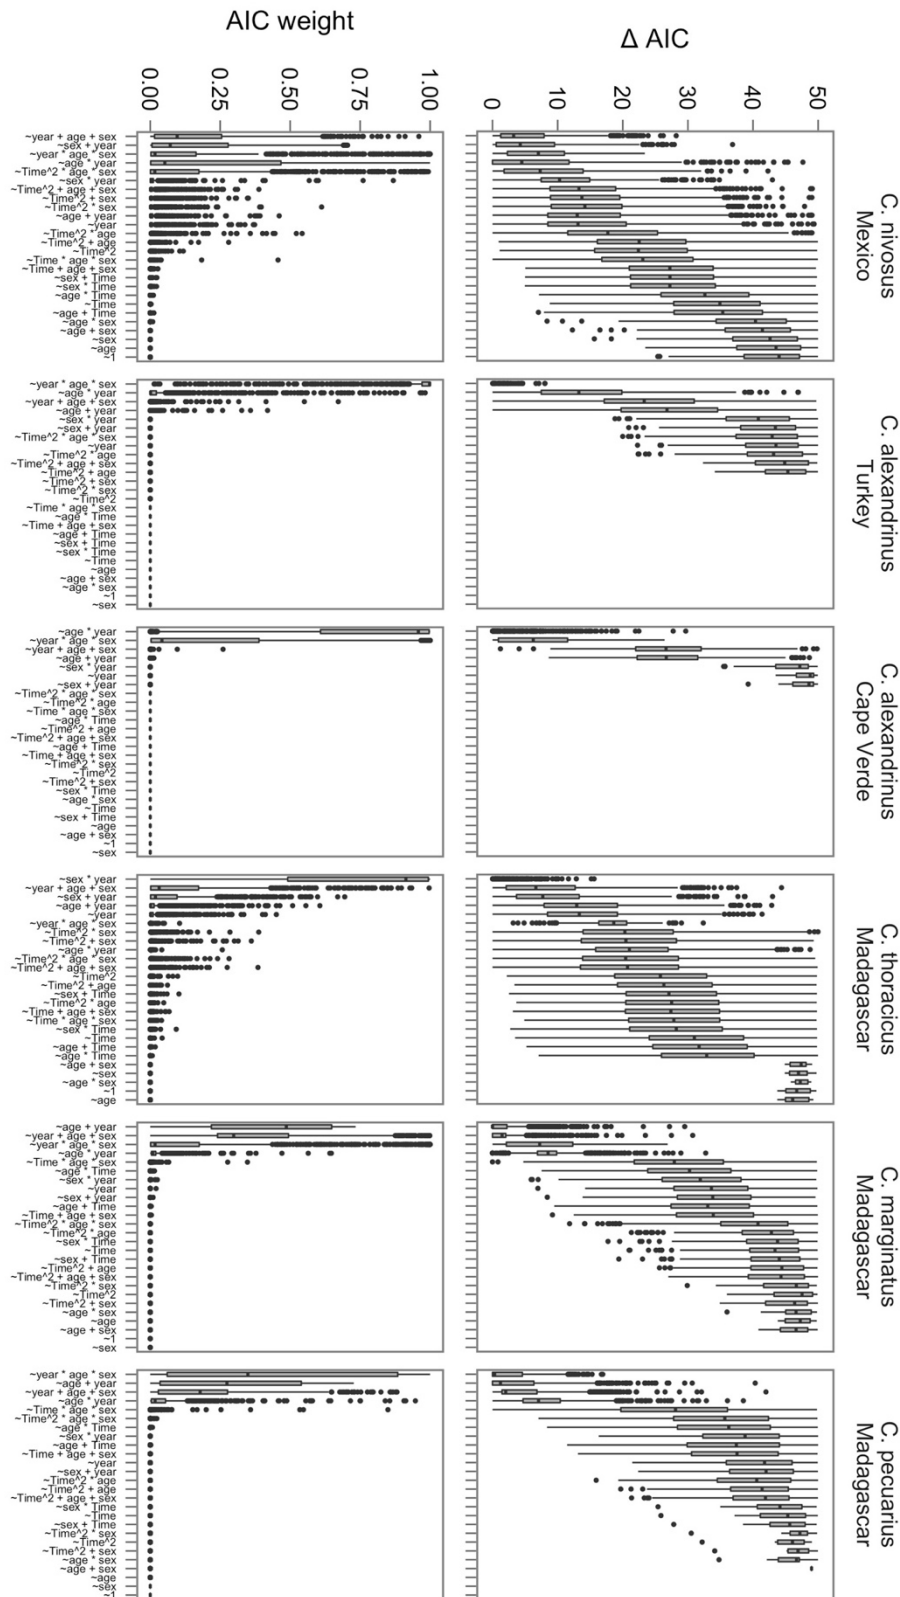

Source: https://www.biorxiv.org/content/10.1101/223941v1.full.pdf
